# Supplementary material for: Structure and stability of complexes of charged structural units of heparin with arginine and lysine
Source: Royal Society of Chemistry journal article supplement (doi:10.1039/c2ra22062h), 2012-12-12
Supplement: c2ra22062h.pdf [file c2ra22062h.pdf]

## Molecular Structure and Stability of Complexes of Charged Structural Units of Heparin with Arginine and Lysine

Milan Remko<sup>\*a,b</sup>, Piet Th. Van Duijnen<sup>c</sup>, Ria Broer<sup>c</sup>

<sup>a</sup>Department of Pharmaceutical Chemistry, Comenius University in Bratislava, Odbojarov  
10, 832 32 Bratislava, Slovakia

<sup>b</sup>Center for Hemostasis and Thrombosis, Hemo Medika Bratislava, 851 04 Bratislava,  
Slovakia

<sup>c</sup>Department of Theoretical Chemistry, Zernike Institute for Advanced Materials, University  
of Groningen, Nijenborgh 4, 9747 AG Groningen, The Netherlands

### Supporting Information

Overall shape of the fourteen complexes investigated computed at the Becke3LYP/6-  
31+G(d,p) level of theory (bond lengths are in Angstroms).

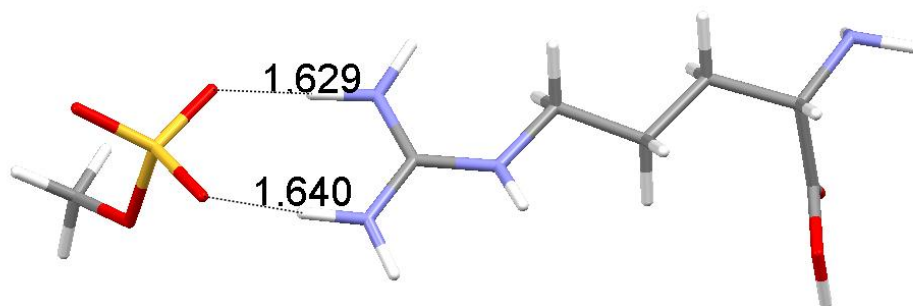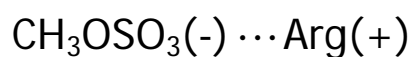

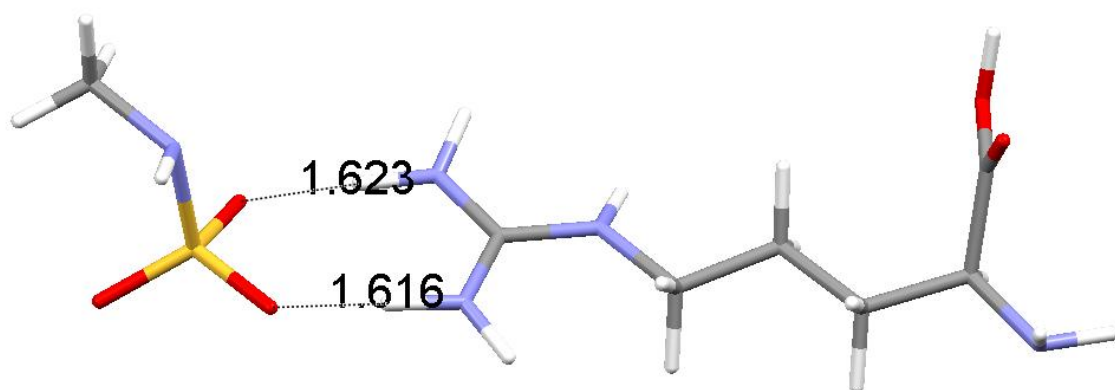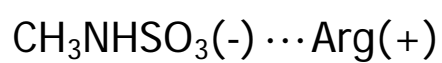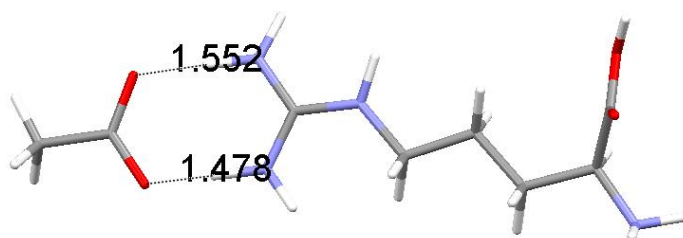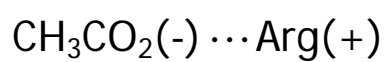

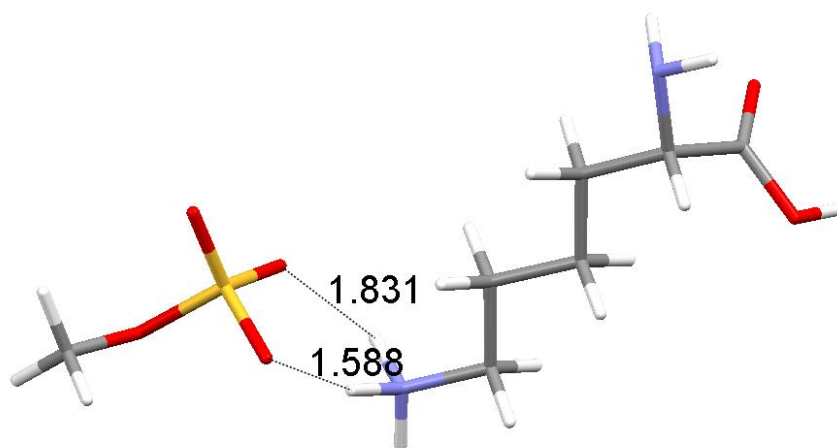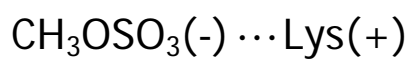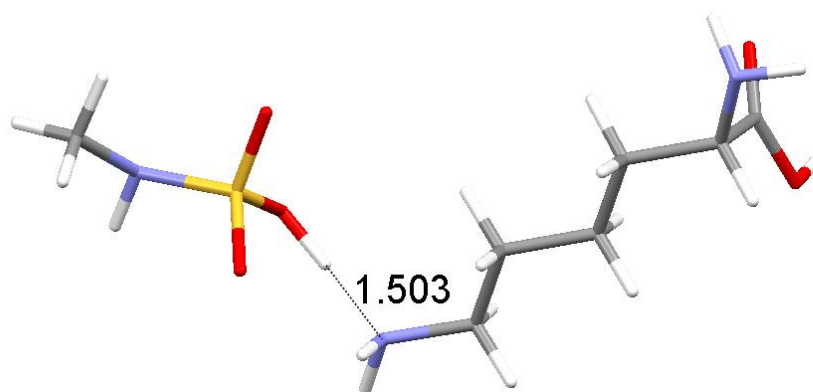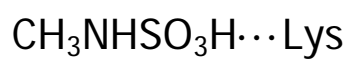

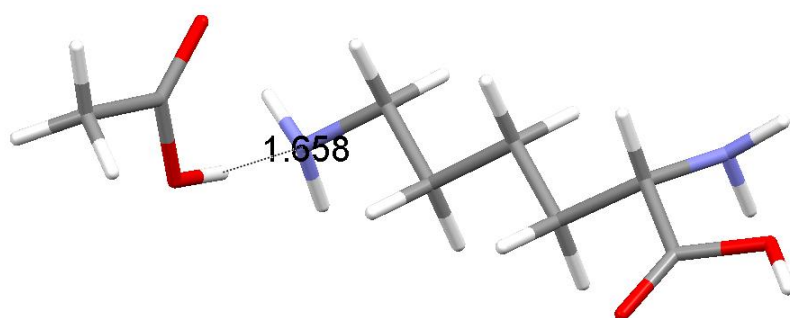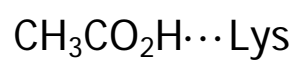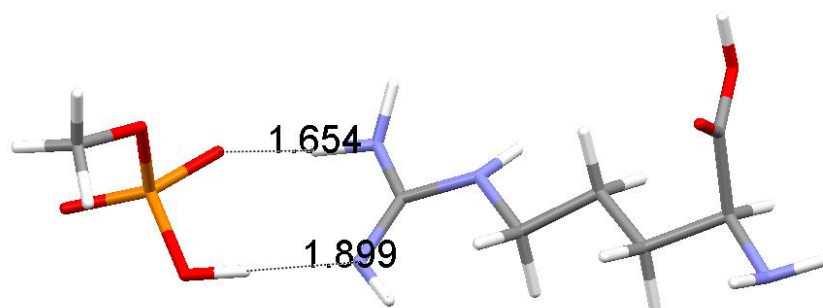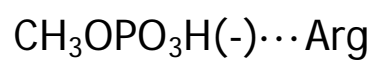

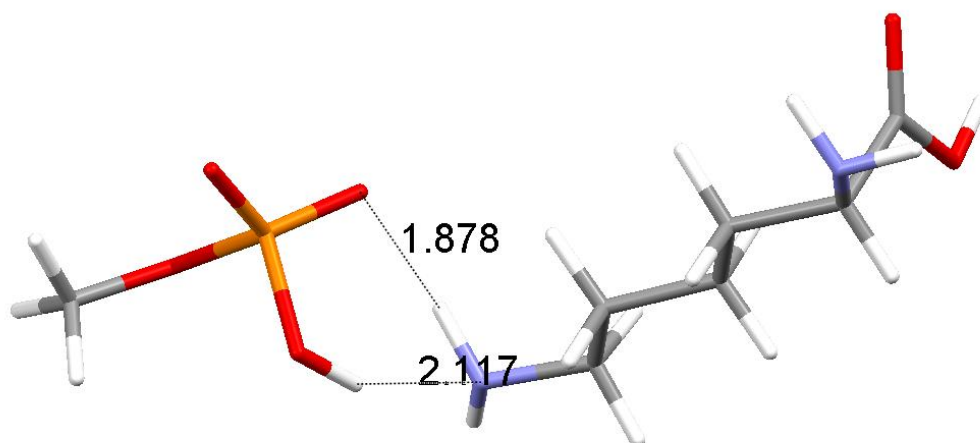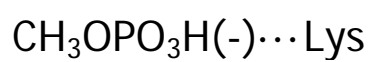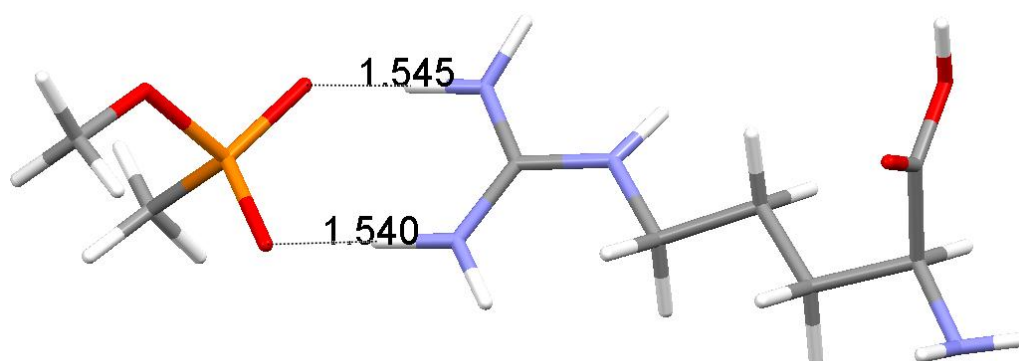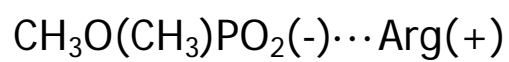

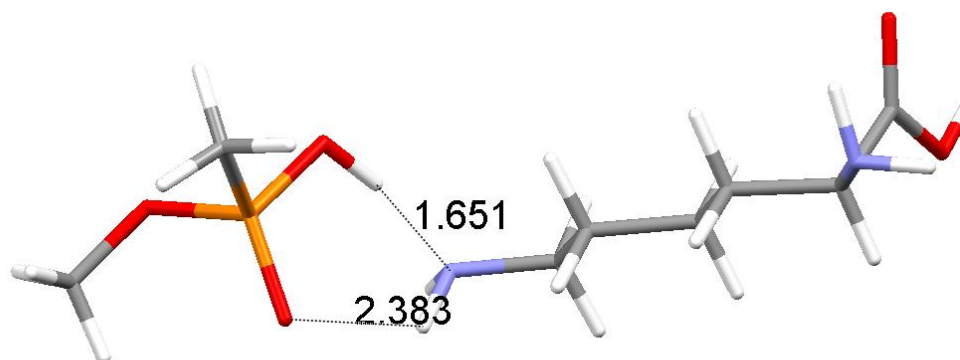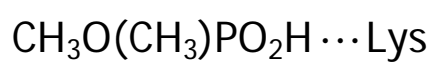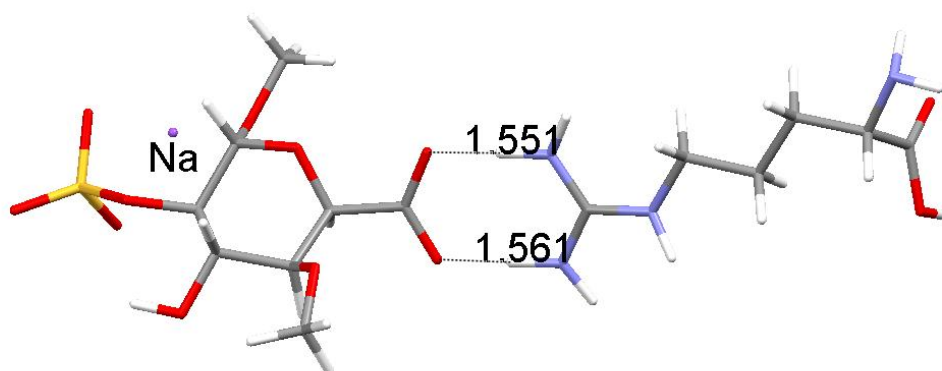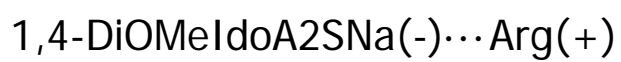

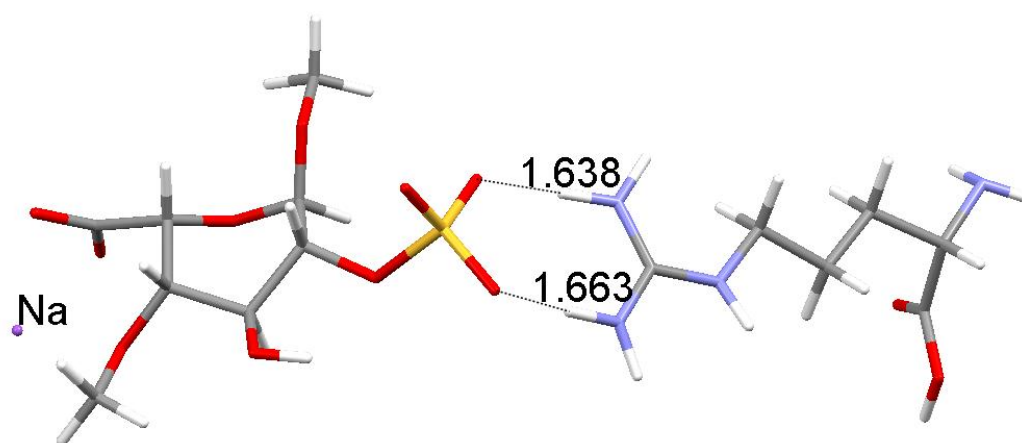

1,4-DiOMeIdoA2SNa(-)⋯Arg(+)

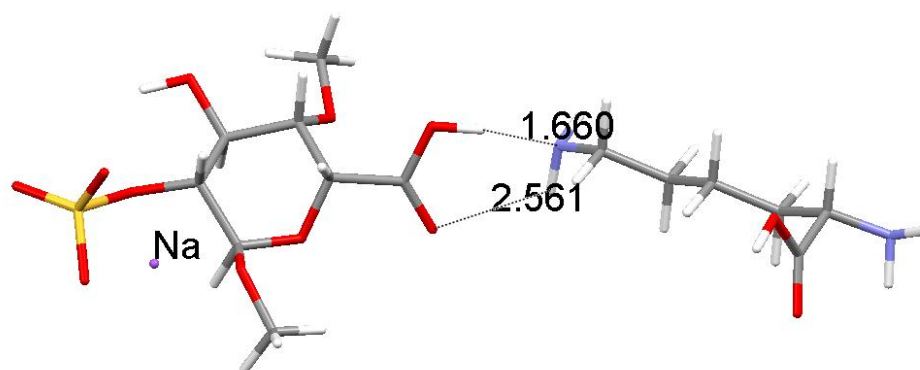

1,4-DiOMeIdoA2SNaH⋯Lys

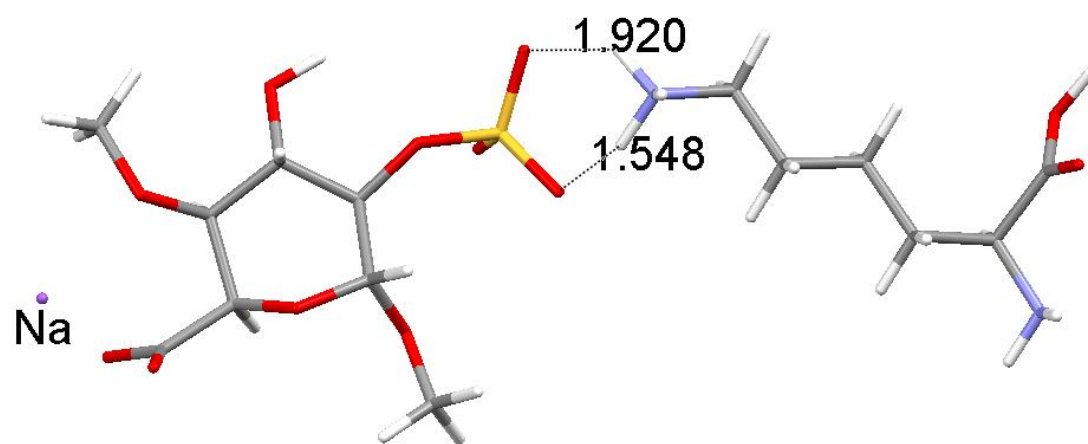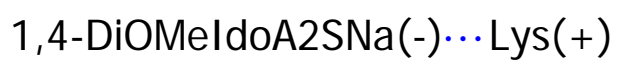

Fig. A: B3LYP optimized structures of the systems studied
